# Supplementary material
Source: PubMed Central journal article supplement (PMC4796928)
Supplement: ismej2015164x7.pdf [file ismej2015164x7.pdf]

**Table S3.** Results of Mantel tests (Replacement and Nestedness components vs spatial distance) and partial Mantel correlograms (in relation to biotic and abiotic factors).

|                       | Mantel test              |         |                         |         | Mantel correlograms (in the first distance class)             |                 |             |         |             |               |             |         |
|-----------------------|--------------------------|---------|-------------------------|---------|---------------------------------------------------------------|-----------------|-------------|---------|-------------|---------------|-------------|---------|
|                       | Replacement <sup>1</sup> |         | Nestedness <sup>2</sup> |         | Partial Mantel test controlling the effect of other variables |                 |             |         |             |               |             |         |
|                       | Mantel-r                 | P value | Mantel-r                | P value | Mantel test                                                   | Plant community |             | Soil    |             | Neighbourhood |             |         |
|                       | Mantel-r                 | P value | Mantel-r                | P value | Mantel-r                                                      | P value         | Mantel-r    | P value | Mantel-r    | P value       | Mantel-r    | P value |
| Site1                 |                          |         |                         |         |                                                               |                 |             |         |             |               |             |         |
| Fungi                 | 0.13                     | 0.08    | -0.04                   | 0.62    | <b>0.14</b>                                                   | <b>0.04</b>     | 0.02        | 0.37    | <b>0.15</b> | 0.02          | 0.1         | 0.07    |
| Basidiomycota         | <b>0.3</b>               | 0       | -0.04                   | 0.66    | 0.25                                                          | 0               | 0.13        | 0.06    | <b>0.24</b> | 0             | <b>0.18</b> | 0.01    |
| Ascomycota            | 0                        | 0.5     | 0.01                    | 0.41    | ns                                                            | -               | ns          | -       | ns          | -             | ns          | -       |
| Ectomycorrhizal fungi | <b>0.37</b>              | 0       | -0.2                    | 0.99    | <b>0.52</b>                                                   | <b>0</b>        | <b>0.43</b> | 0       | <b>0.56</b> | 0             | <b>0.4</b>  | 0       |
| Zygomycota            | 0.15                     | 0.05    | -0.09                   | 0.86    | <b>0.12</b>                                                   | <b>0.02</b>     | 0.03        | 0.29    | 0.11        | 0.02          | 0.08        | 0.08    |
| Chytridiomycota       | 0.02                     | 0.42    | -0.01                   | 0.49    | ns                                                            | -               | -           | -       | -           | -             | -           | -       |
| Metazoa               | 0.01                     | 0.42    | 0.02                    | 0.33    | ns                                                            | -               | -           | -       | -           | -             | -           | -       |
| Rhizaria              | <b>0.34</b>              | 0.02    | -0.24                   | 0.99    | <b>0.35</b>                                                   | <b>0.01</b>     | <b>0.28</b> | 0.02    | 0.35        | 0.01          | <b>0.34</b> | 0       |
| Saprotrophic fungi    | 0.14                     | 0.08    | -0.07                   | 0.78    | ns                                                            | -               | -           | -       | -           | -             | -           | -       |
| Parasitic fungi       | -0.15                    | 0.93    | 0.06                    | 0.22    | ns                                                            | -               | -           | -       | -           | -             | -           | -       |
| Chlorophyta           | -0.25                    | 0.98    | 0.22                    | 0.04    | ns                                                            | -               | -           | -       | -           | -             | -           | -       |
| Site2                 |                          |         |                         |         |                                                               |                 |             |         |             |               |             |         |
| Fungi                 | 0.18                     | 0.06    | -0.04                   | 0.61    | ns                                                            | -               | -           | -       | -           | -             | -           | -       |
| Basidiomycota         | 0.1                      | 0.19    | -0.02                   | 0.51    | <b>0.16</b>                                                   | <b>0.03</b>     | 0.09        | 0.08    | <b>0.15</b> | 0.03          | <b>0.14</b> | 0.03    |
| Ascomycota            | 0.05                     | 0.31    | 0.02                    | 0.39    | -                                                             | -               | -           | -       | -           | -             | -           | -       |
| Ectomycorrhizal fungi | <b>0.24</b>              | 0       | -0.12                   | 0.96    | <b>0.21</b>                                                   | <b>0</b>        | <b>0.18</b> | 0       | <b>0.21</b> | 0             | <b>0.12</b> | 0.02    |
| Zygomycota            | 0.18                     | 0.06    | 0.02                    | 0.41    | ns                                                            | -               | -           | -       | -           | -             | -           | -       |
| Chytridiomycota       | 0.13                     | 0.05    | -0.08                   | 0.83    | <b>0.08</b>                                                   | <b>0.05</b>     | 0.07        | 0.04    | 0.07        | 0.07          | 0.06        | 0.08    |

|                    |             |      |       |      |    |   |   |   |   |   |   |   |
|--------------------|-------------|------|-------|------|----|---|---|---|---|---|---|---|
| Metazoa            | -0.04       | 0.74 | 0.02  | 0.36 | ns | - | - | - | - | - | - | - |
| Rhizaria           | 0.22        | 0.07 | -0.13 | 0.87 | ns | - | - | - | - | - | - | - |
| Saprotrophic fungi | <b>0.21</b> | 0.04 | -0.03 | 0.6  | ns | - | - | - | - | - | - | - |
| Parasitic fungi    | -0.07       | 0.83 | 0.05  | 0.22 | ns | - | - | - | - | - | - | - |
| Chlorophyta        | 0.13        | 0.11 | -0.11 | 0.88 | ns | - | - | - | - | - | - | - |

### Site3

|                       |             |      |       |      |             |             |             |             |             |      |             |      |
|-----------------------|-------------|------|-------|------|-------------|-------------|-------------|-------------|-------------|------|-------------|------|
| Fungi                 | <b>0.29</b> | 0    | 0.02  | 0.38 | 0.38        | 0           | 0.06        | 0.2         | 0.35        | 0    | <b>0.3</b>  | 0    |
| Basidiomycota         | <b>0.37</b> | 0    | -0.19 | 0.98 | <b>0.46</b> | <b>0</b>    | <b>0.24</b> | 0.01        | <b>0.44</b> | 0    | <b>0.41</b> | 0    |
| Ascomycota            | -0.02       | 0.56 | -0.06 | 0.71 | ns          | -           | -           | -           | -           | -    | -           | -    |
| Ectomycorrhizal fungi | <b>0.37</b> | 0    | -0.2  | 1    | <b>0.56</b> | <b>0</b>    | 0.38        | <b>0</b>    | <b>0.55</b> | 0    | <b>0.5</b>  | 0    |
| Zygomycota            | <b>0.23</b> | 0.02 | 0.07  | 0.21 | <b>0.35</b> | <b>0</b>    | 0.11        | 0.1         | <b>0.31</b> | 0    | <b>0.32</b> | 0    |
| Chytridiomycota       | 0.12        | 0.16 | -0.03 | 0.64 | ns          | -           | ns          | -           | -           | -    | -           | -    |
| Metazoa               | 0.06        | 0.33 | -0.01 | 0.51 | ns          | -           | -           | -           | -           | -    | -           | -    |
| Rhizaria              | 0.1         | 0.2  | -0.13 | 0.9  | <b>0.3</b>  | <b>0</b>    | 0.12        | 0.09        | <b>0.28</b> | 0    | <b>0.23</b> | 0.01 |
| Saprotrophic fungi    | <b>0.24</b> | 0.02 | 0.03  | 0.37 | <b>0.34</b> | <b>0</b>    | 0.07        | <b>0.21</b> | <b>0.3</b>  | 0    | <b>0.29</b> | 0    |
| Parasitic fungi       | <b>0.22</b> | 0.01 | -0.22 | 1    | <b>0.22</b> | <b>0.01</b> | 0.15        | 0.04        | <b>0.22</b> | 0.01 | <b>0.22</b> | 0.01 |
| Chlorophyta           | 0.12        | 0.21 | -0.05 | 0.48 | ns          | -           | -           | -           | -           | -    | -           | -    |

1. Species turnover component

2. Variation of species richness that results in nestedness

3. Effect of each variable (plant community, soil and neighbourhood effect)

has been controlled when testing the correlation between the target community and spatial distance.
