# Supplementary material
Source: PubMed Central journal article supplement (PMC4796928)

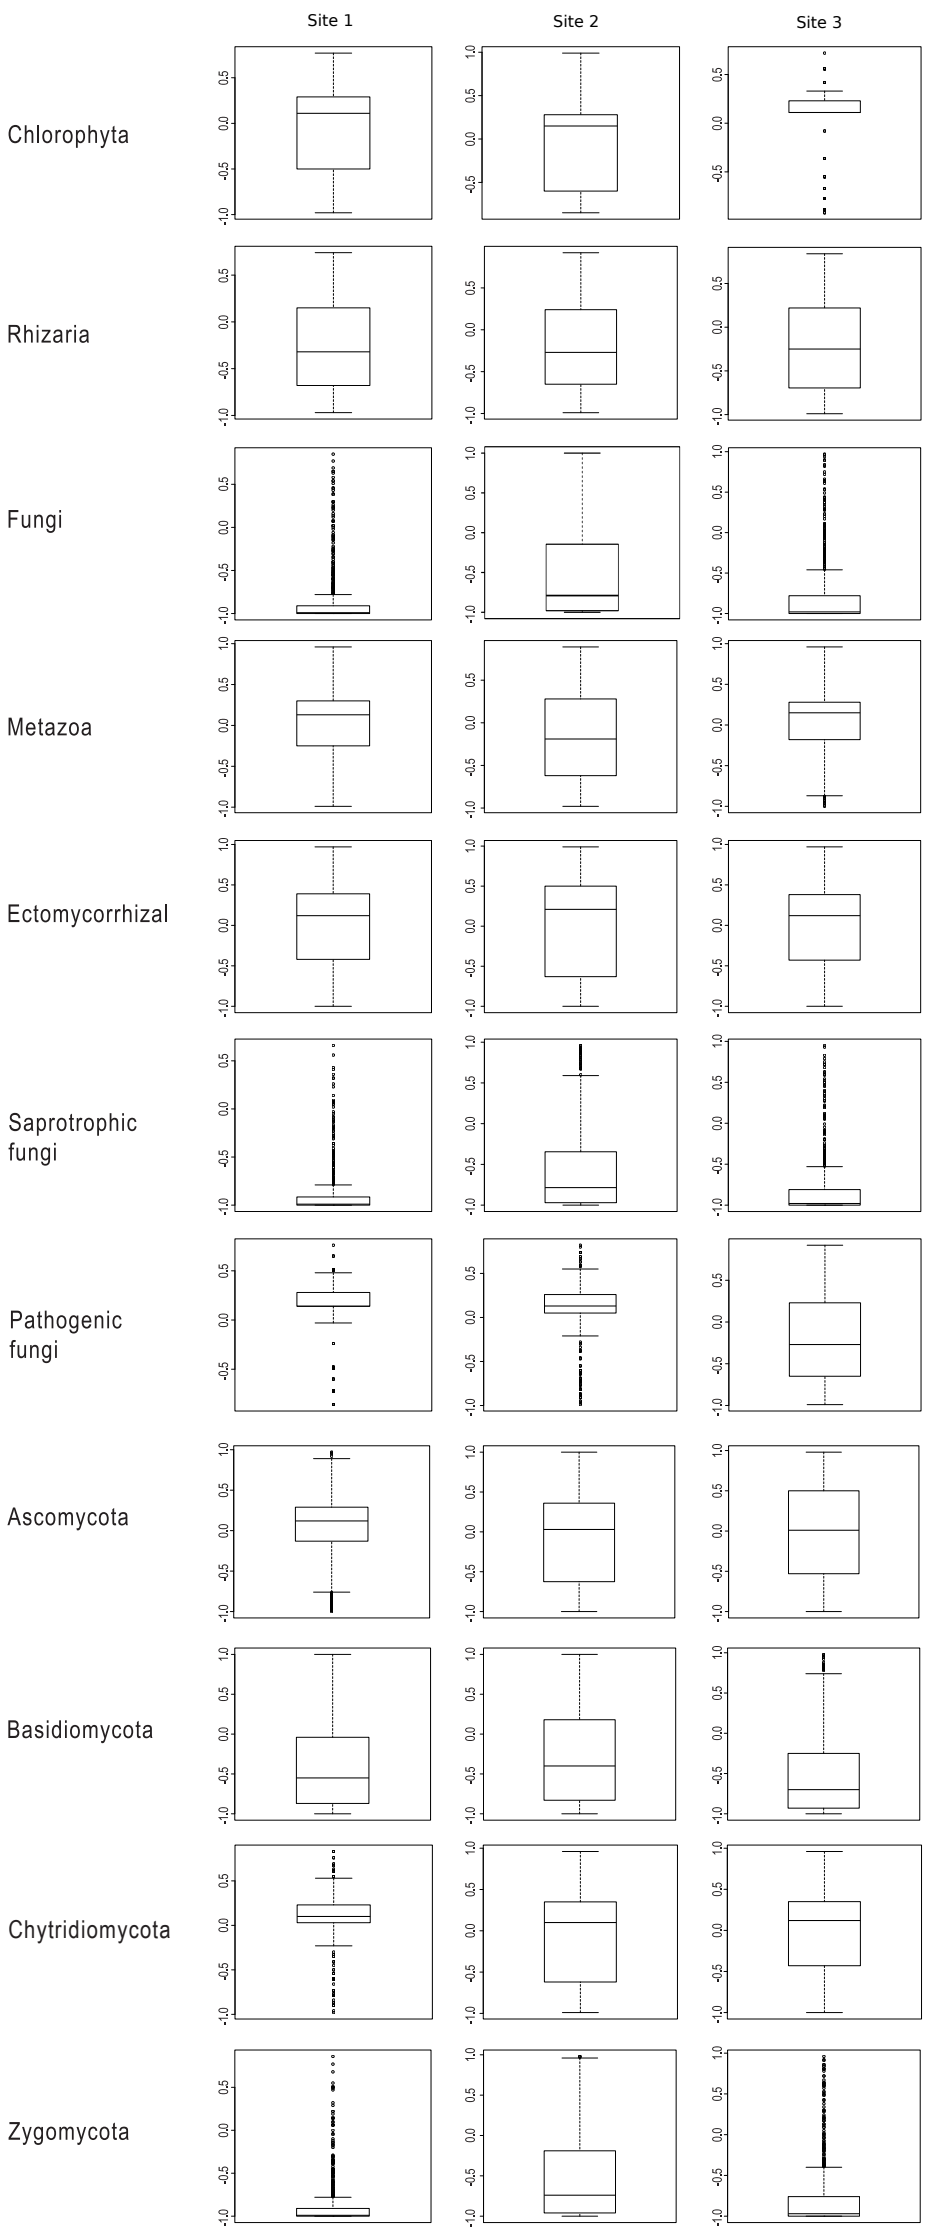

Supplement: ismej2015164x2.pdf [file ismej2015164x2.pdf]

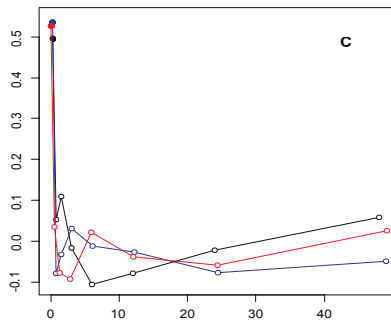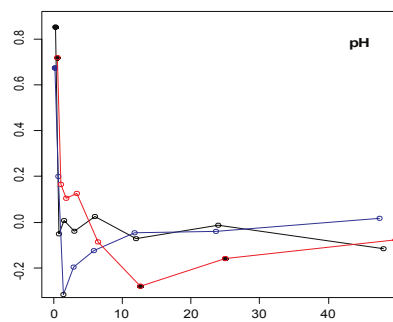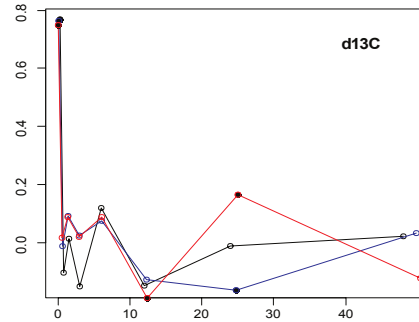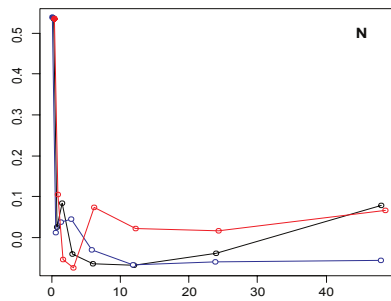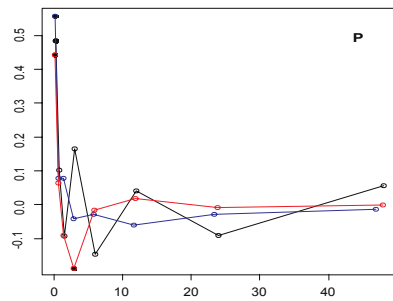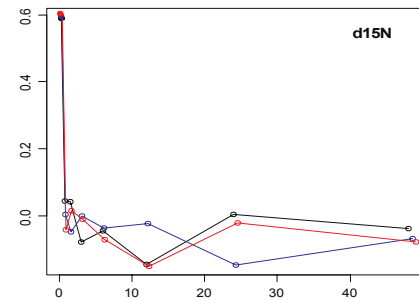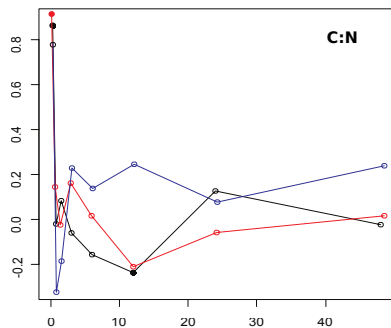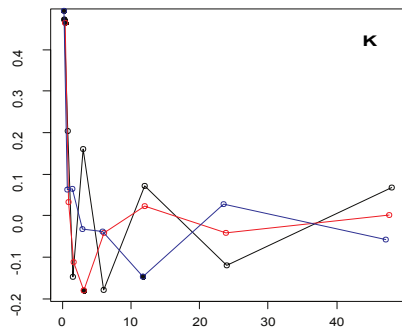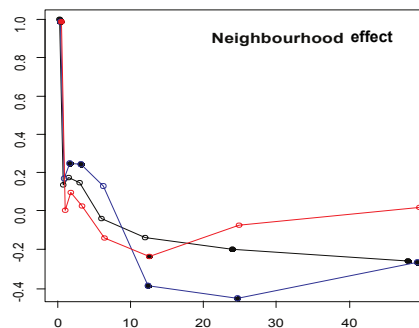

Spatial distance (m)

Supplement: ismej2015164x3.pdf [file ismej2015164x3.pdf]
